# Supplementary material for: Water-soluble transition metal complexes of ruthenium(ii), osmium(ii), rhodium(iii) and iridium(iii) with chelating N-heterocyclic carbene ligands in hydrogenation and transfer hydrogenation catalysis
Source: Royal Society of Chemistry journal article supplement (doi:10.1039/c7dt04684g), 2018-01-01
Supplement: c7dt04684g1.pdf [file c7dt04684g1.pdf]

# Water-soluble transition metal complexes of Ruthenium(II), Osmium(II), Rhodium (III) and Iridium (III) with chelating *N*-heterocyclic carbene ligands in hydrogenation and transfer hydrogenation catalysis

## Supporting Information

Esther Bayón Castañón, Marlene Kaposi, Robert M. Reich and Fritz E. Kühn\*

*Catalysis Research Center and Department of Chemistry, Technische Universität München, Professorship of Molecular Catalysis, Lichtenbergstr. 4, D-85747 Garching bei München, Germany.*

*E-mail: fritz.kuehn@ch.tum.de*

### Table of contents

|    |                                                             |      |
|----|-------------------------------------------------------------|------|
| 1. | <sup>1</sup> H and <sup>13</sup> C NMR spectra of complexes | S 2  |
| 2. | X-Ray crystallographic data                                 | S 12 |
| 3. | References                                                  | S 15 |

# 1. $^1\text{H}$ and $^{13}\text{C}$ NMR spectra.

Figure S1.  $^1\text{H}$  (MeOD- $d_4$ , 400MHz) and  $^{13}\text{C}$  (MeOD- $d_4$ , 100 MHz) NMR spectra of **2a**.

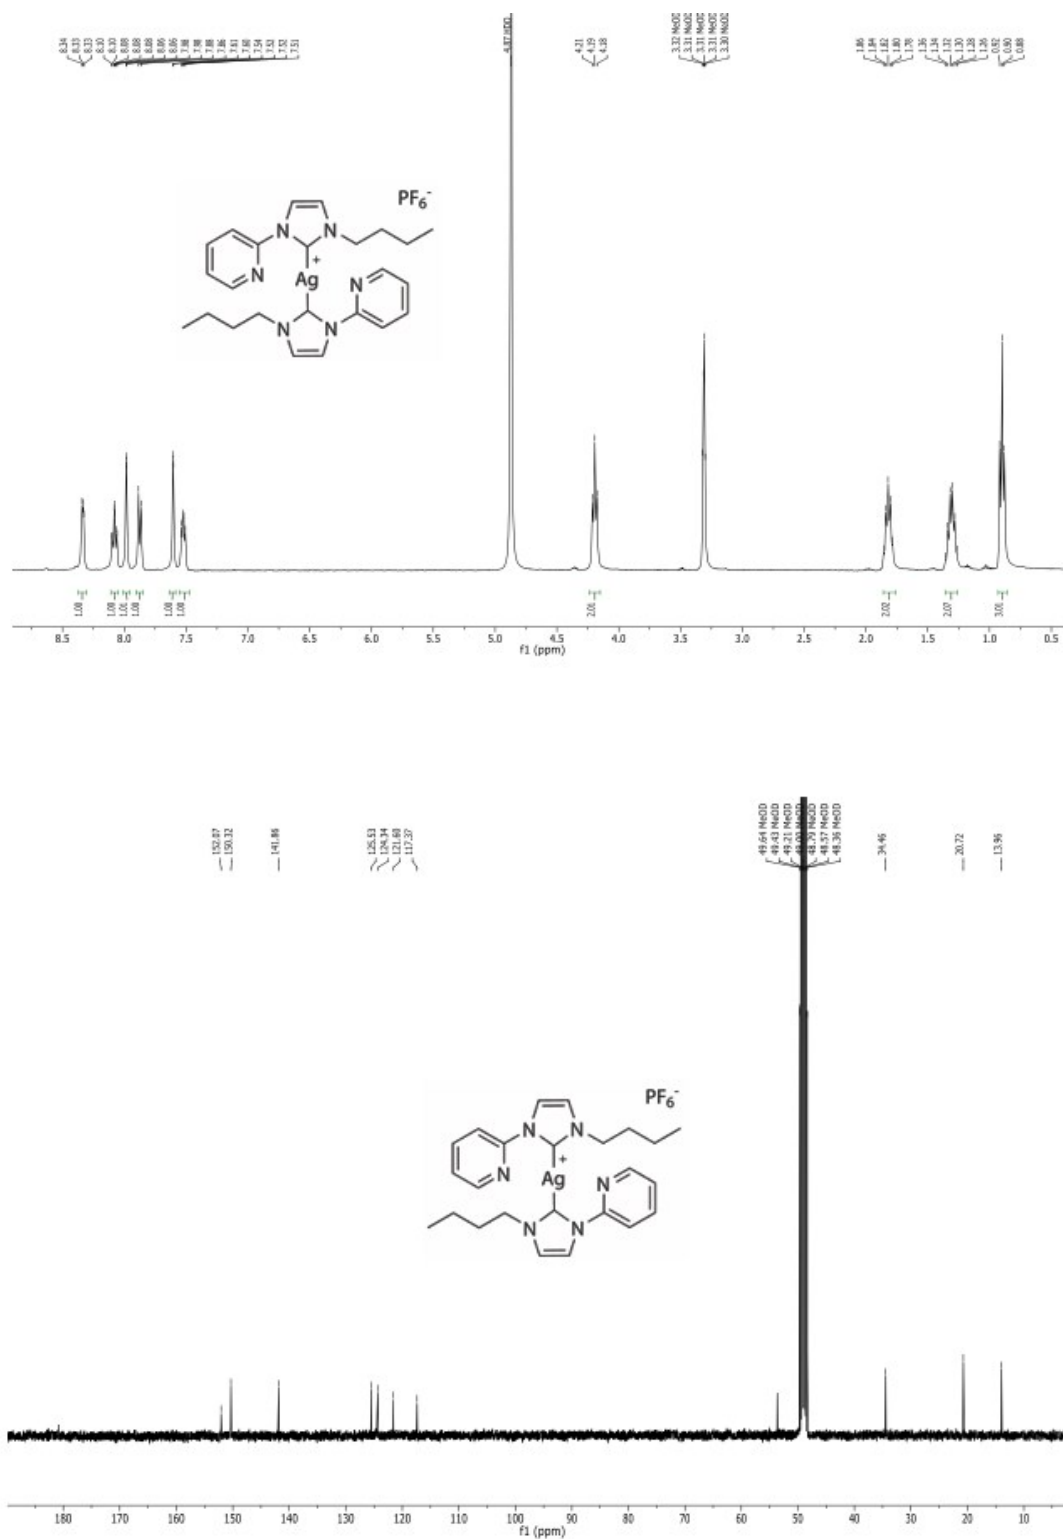

**Figure S2.**  $^1\text{H}$  (DMSO- $d_6$ , 400MHz) and  $^{13}\text{C}$  (DMSO- $d_6$ , 100MHz) NMR spectra of **2b**.

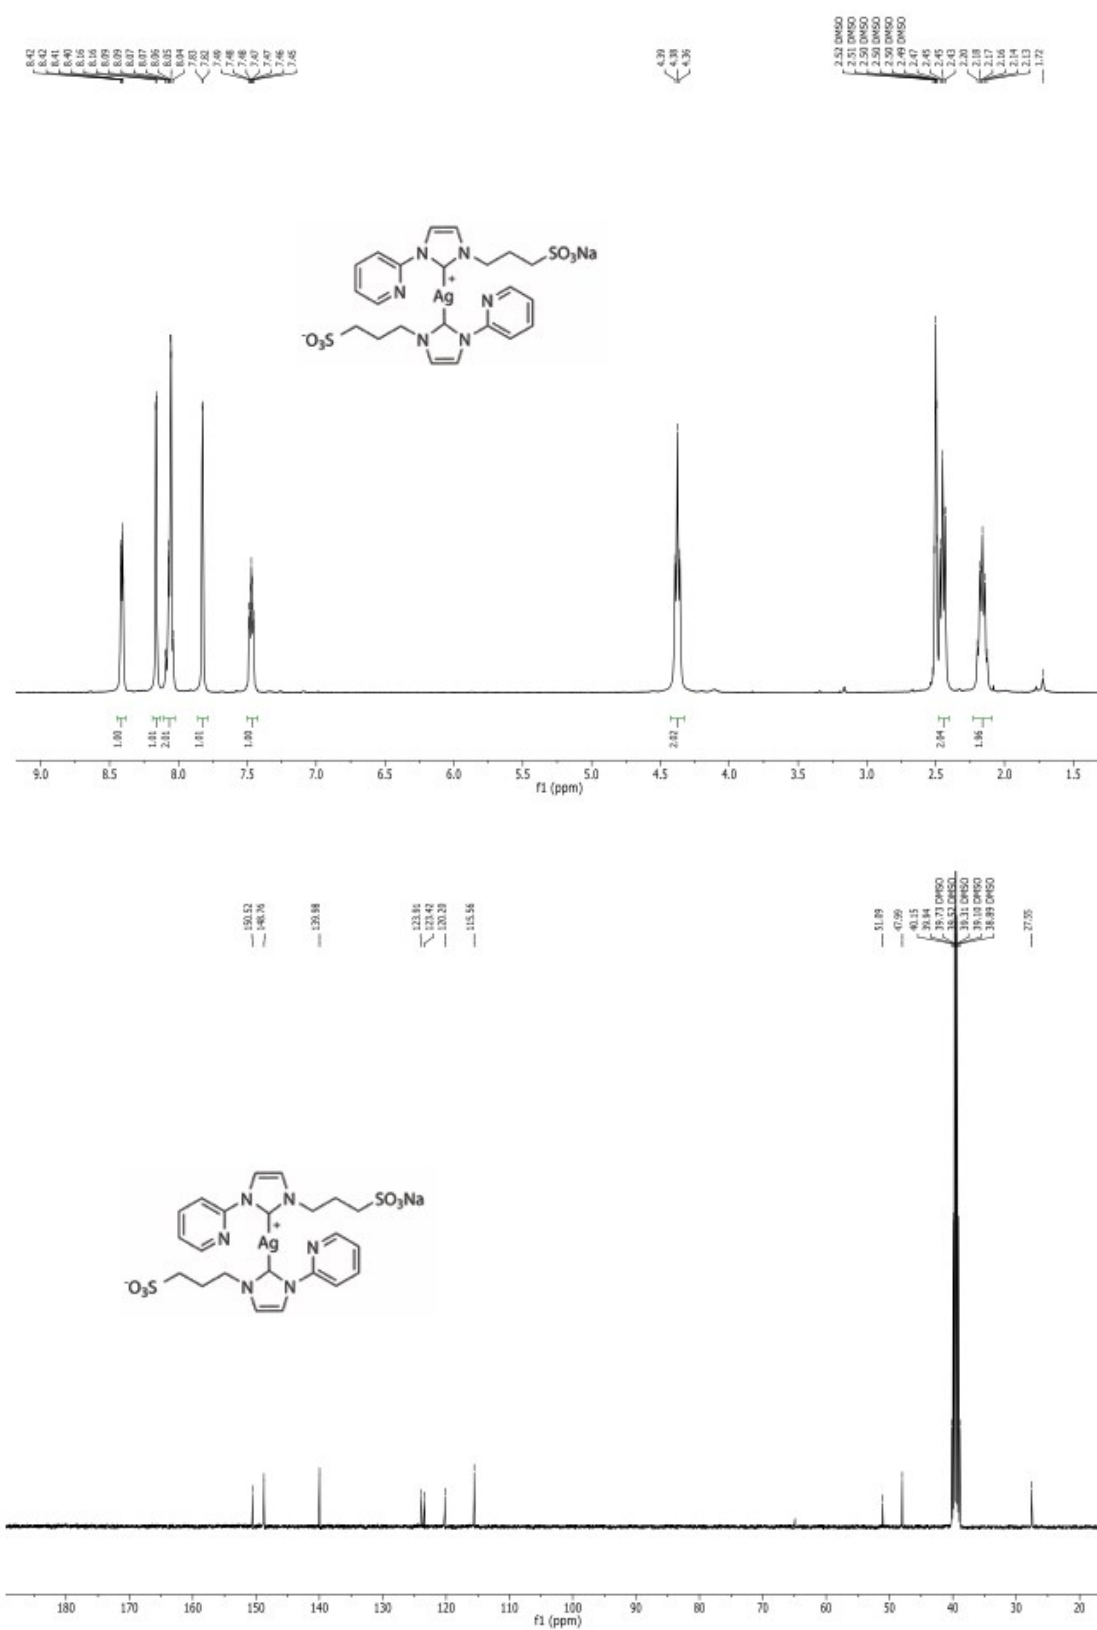

**Figure S3.**  $^1\text{H}$  (MeOD- $d_4$ , 400MHz) and  $^{13}\text{C}$  (MeOD- $d_4$ , 100MHz) NMR spectra of **3a**.

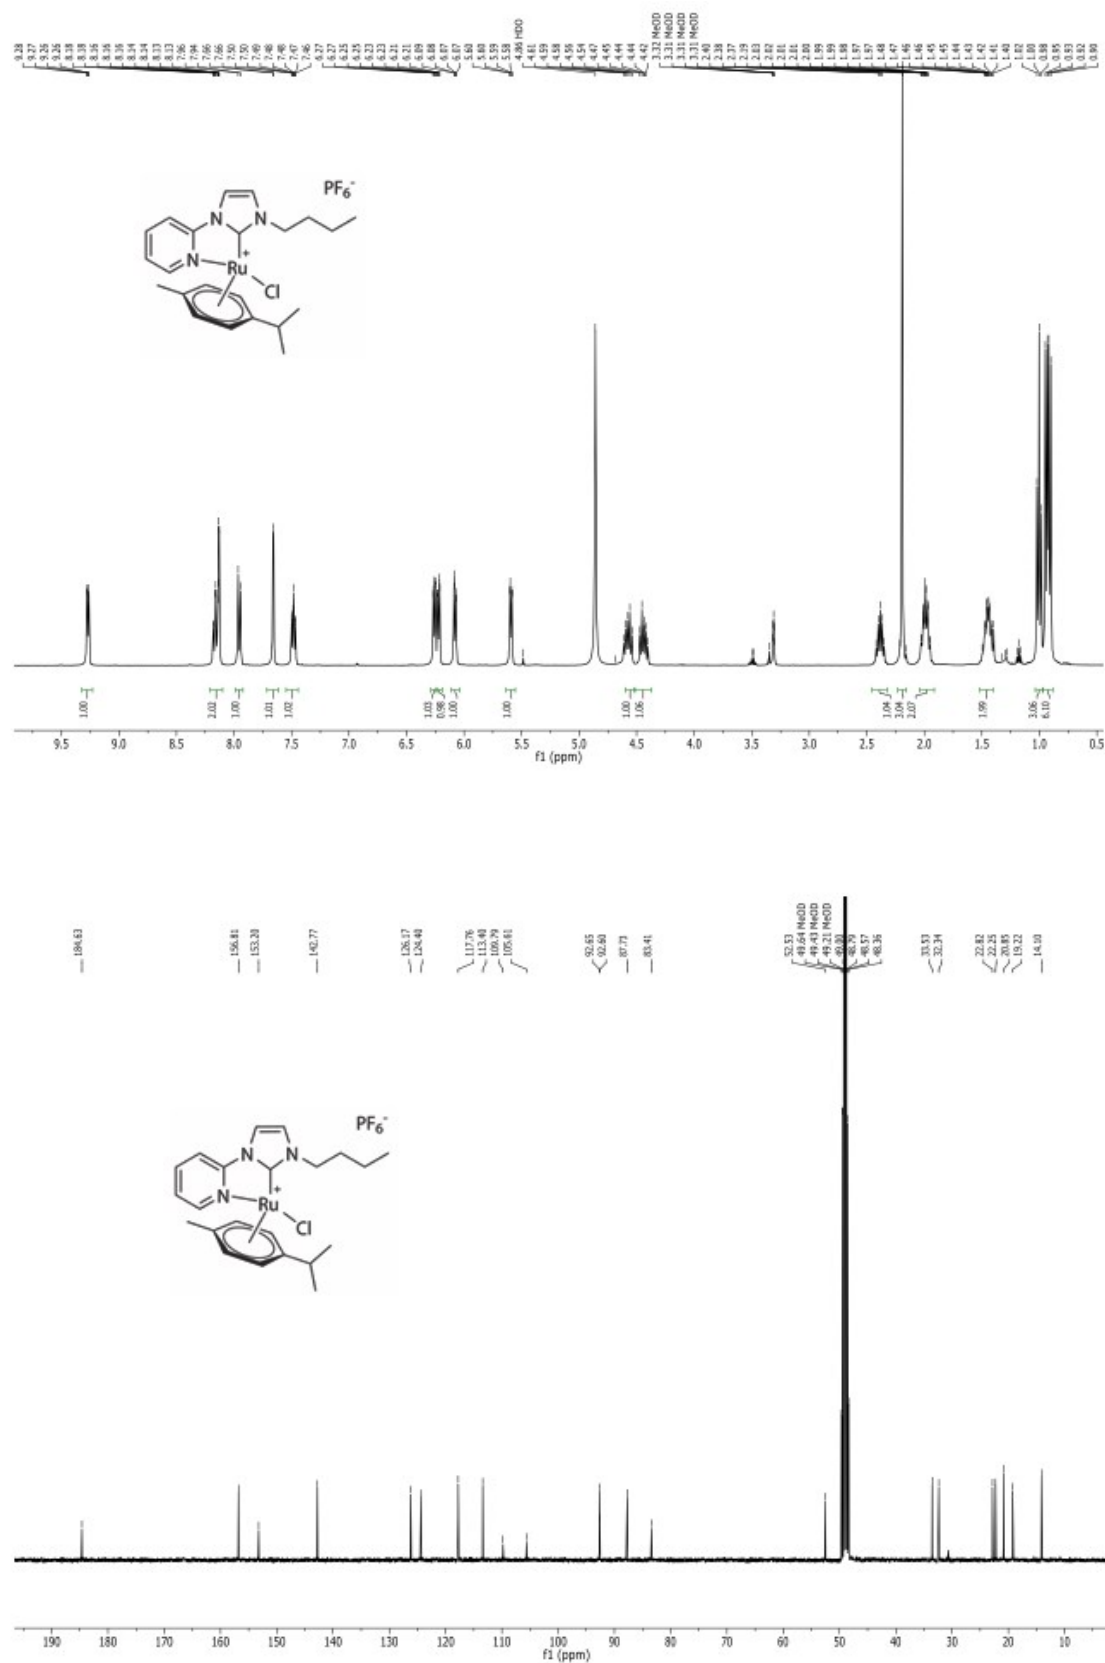

Figure S4.  $^1\text{H}$  (MeOD- $d_4$ , 400MHz) and  $^{13}\text{C}$  (MeOD- $d_4$ , 100MHz) NMR spectra of **4a**.

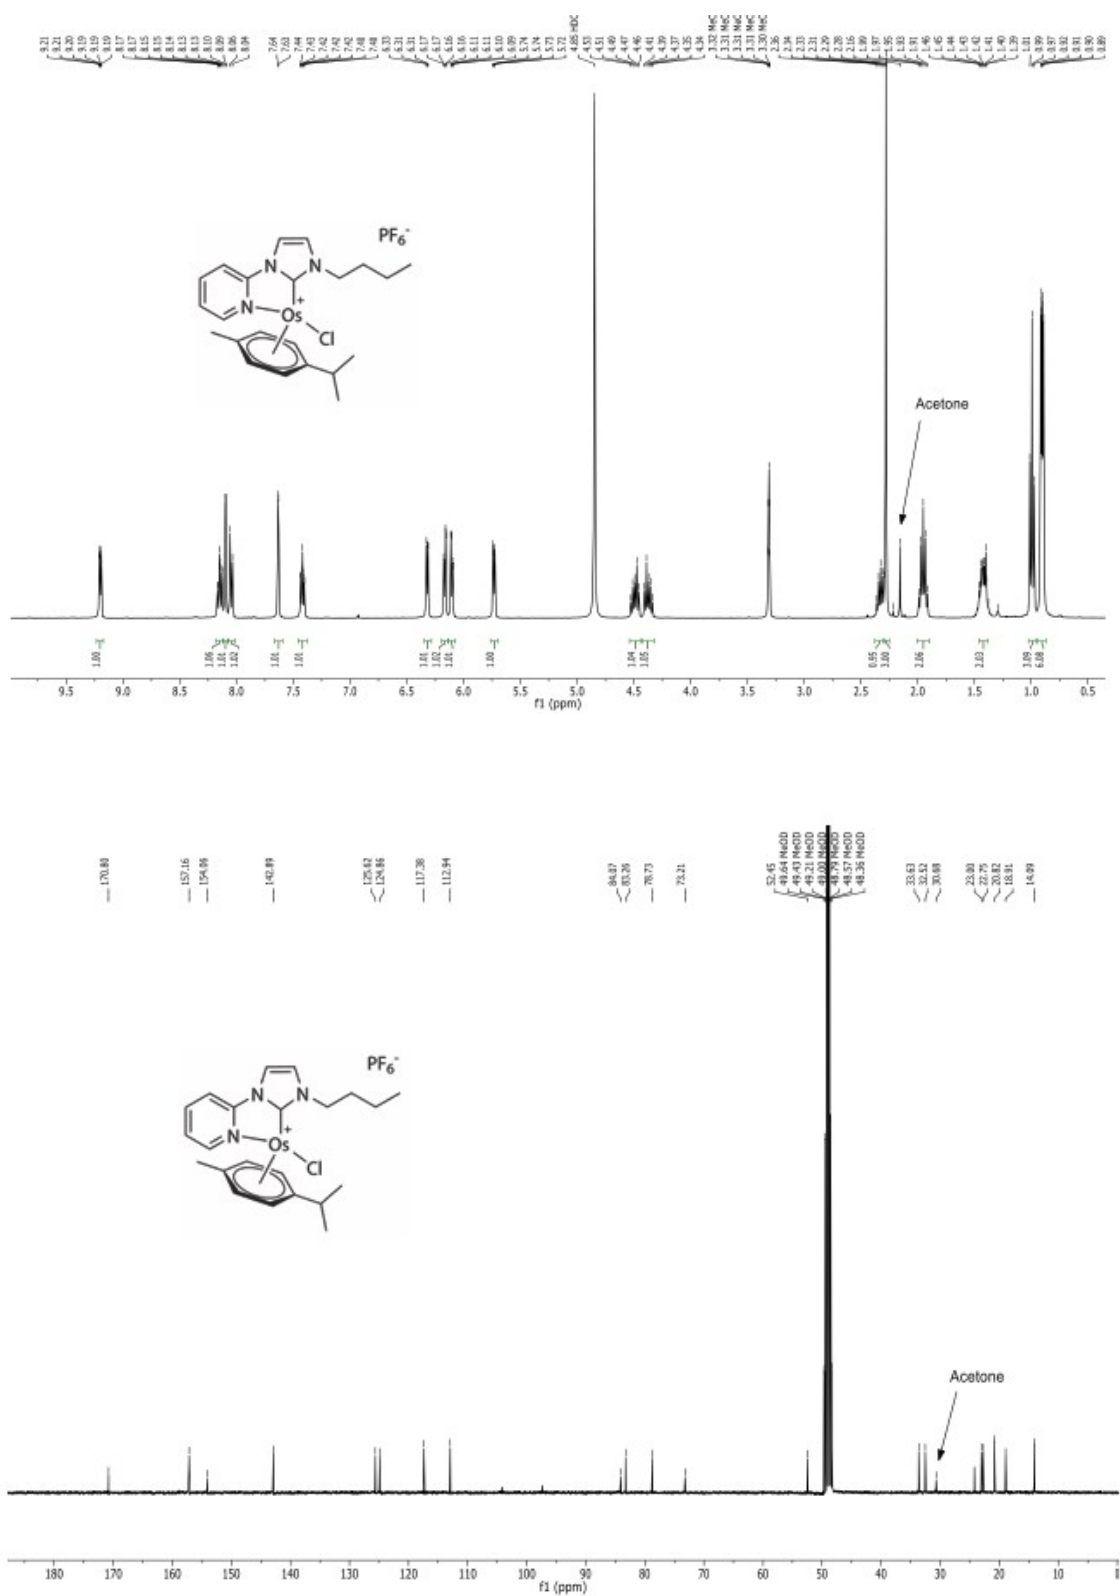

Figure S5.  $^1\text{H}$  (DMSO- $d_6$ , 400MHz) and  $^{13}\text{C}$  (DMSO- $d_6$ , 100MHz) NMR spectra of **5a**.

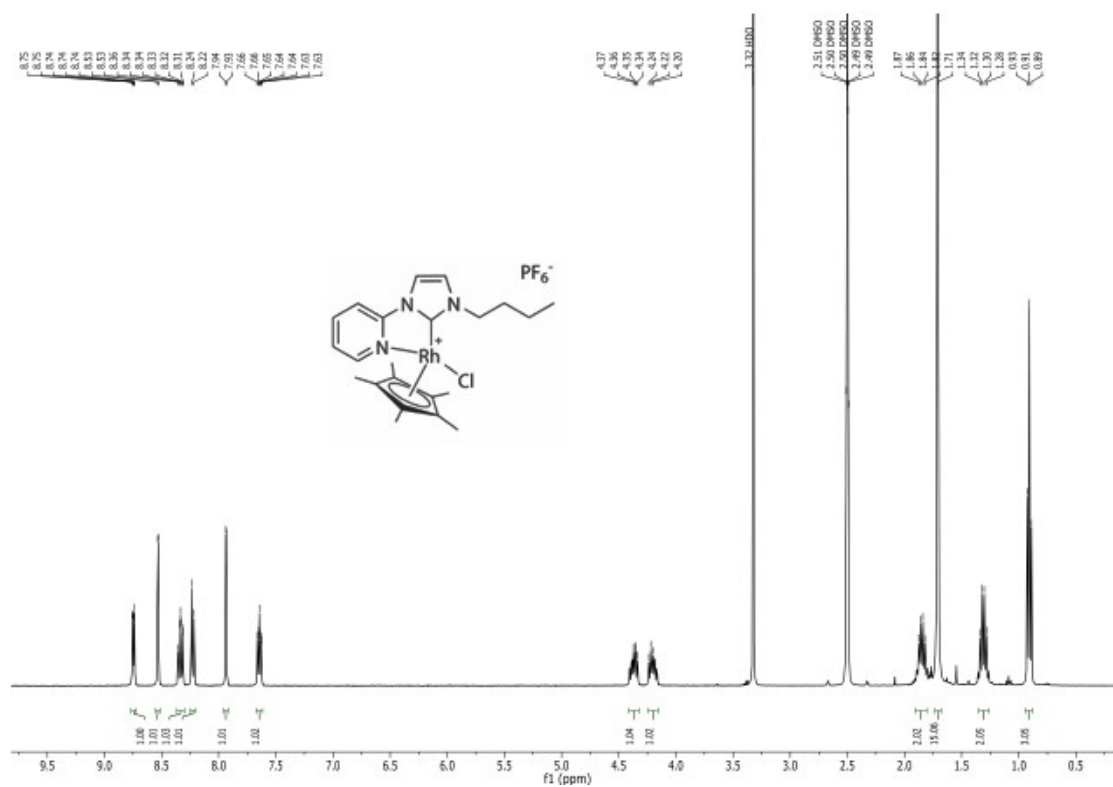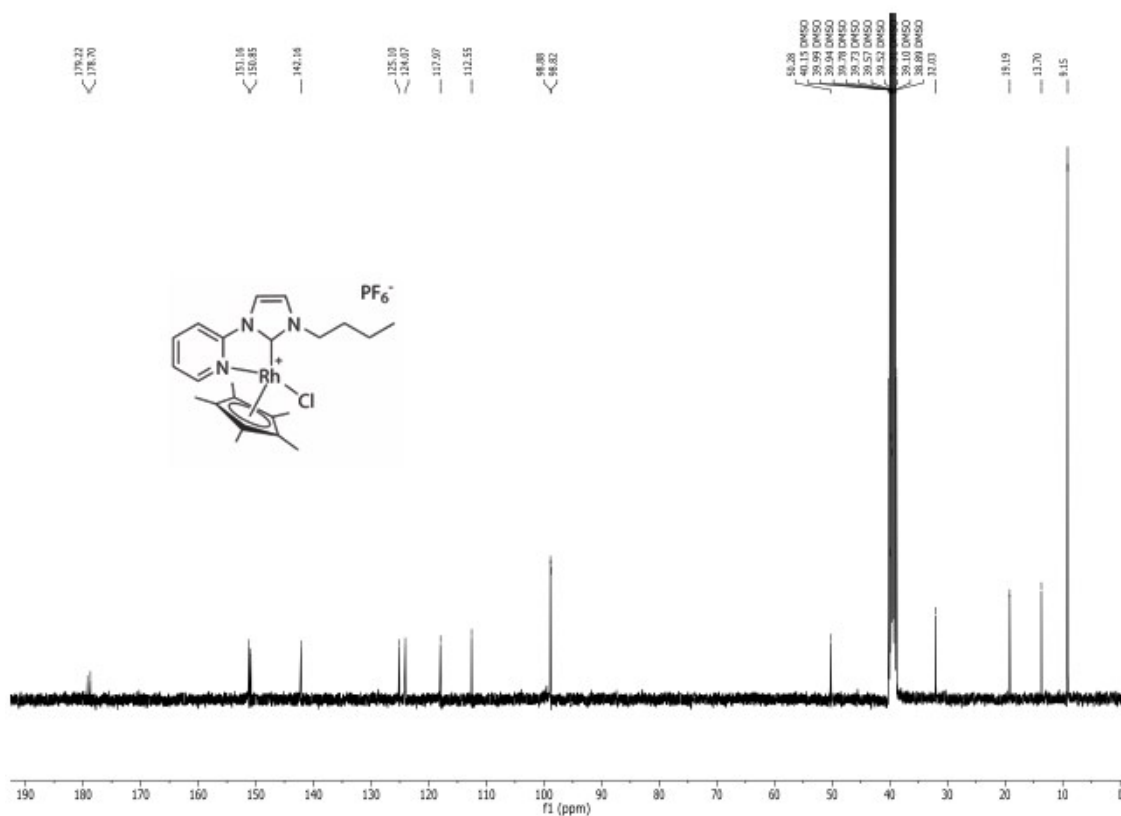

Figure S6.  $^1\text{H}$  (DMSO- $d_6$ , 400MHz) and  $^{13}\text{C}$  (DMSO- $d_6$ , 100MHz) NMR spectra of **6a**.

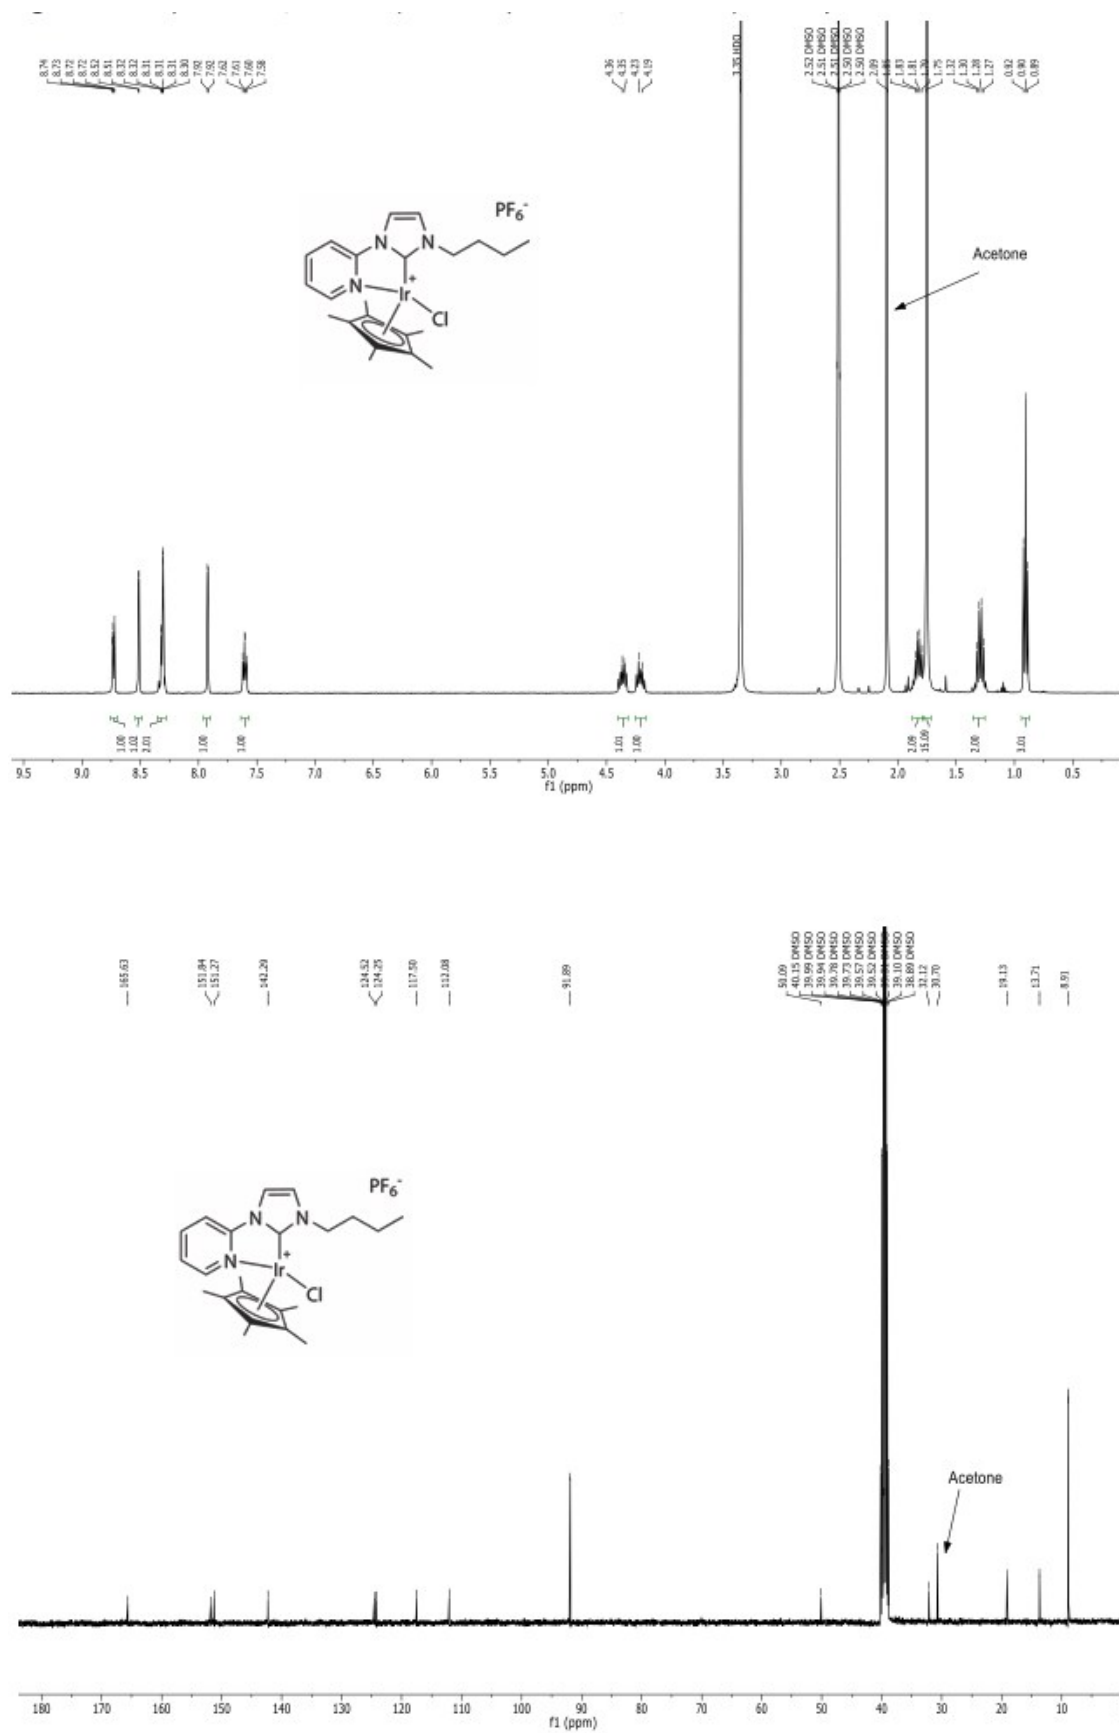







**Figure S9.**  $^1\text{H}$  ( $\text{D}_2\text{O}$ , 400MHz) and  $^{13}\text{C}$  ( $\text{D}_2\text{O}$ , 100MHz) NMR spectra of **5b**.

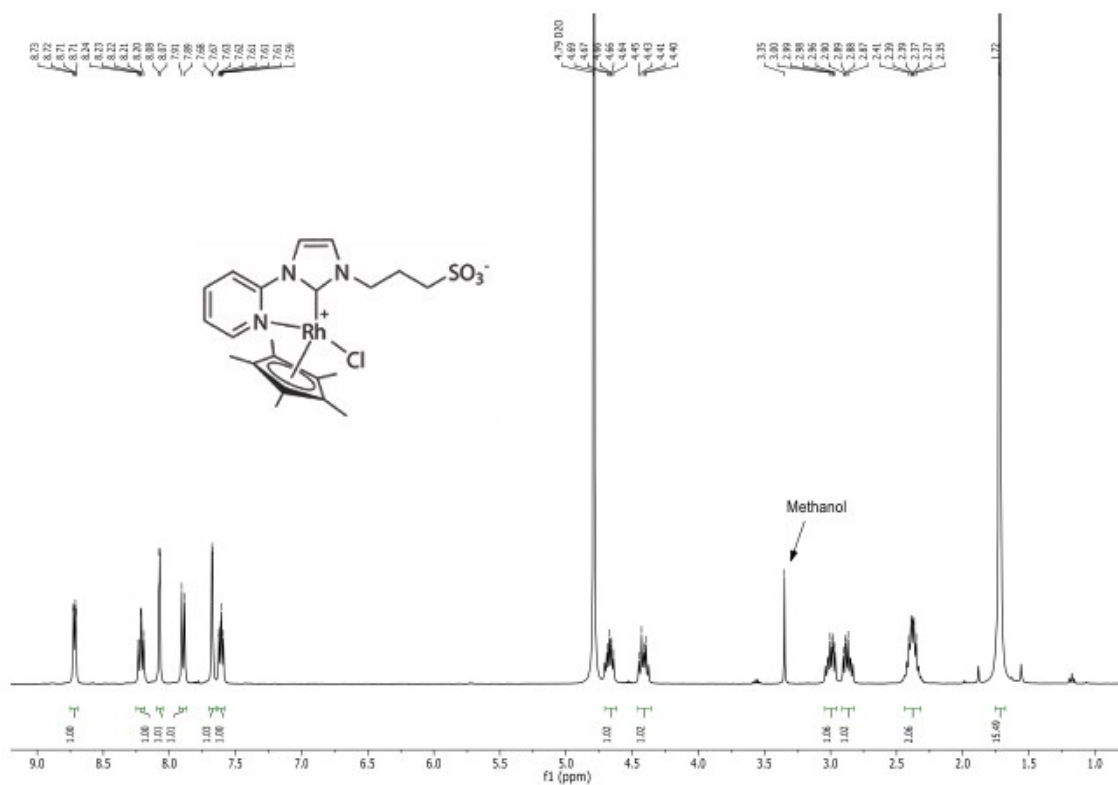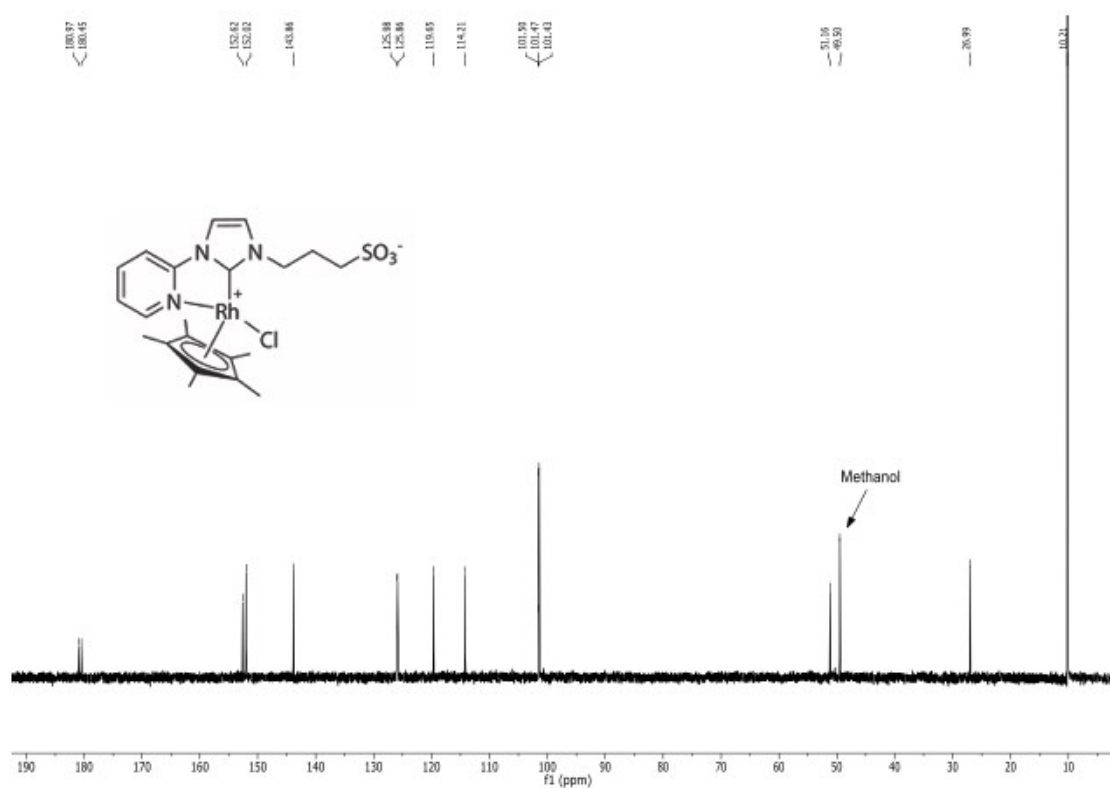



## 2. X-Ray Crystallographic Data

Data were collected on an X-ray single crystal diffractometer equipped with a CCD detector (APEX II,  $\kappa$ -CCD), a rotating anode FR591 equipped with a Montel mirror optic (**5a**, **5b**, **6a**, **6b**) or a fine focused sealed tube equipped with a graphite monochromator (**2a**, **2b**, **4b**) by using the APEXII software package.<sup>S1</sup> The measurements were performed on single crystals coated with perfluorinated ether. The crystals were fixed on the top of a glass fiber and transferred to the diffractometer. Crystals were frozen under a stream of cold nitrogen. A matrix scan was used to determine the initial lattice parameters. Reflections were corrected for Lorentz and polarization effects, scan speed, and background using SAINT.<sup>S2</sup> Absorption corrections, including odd and even ordered spherical harmonics were performed using SADABS.<sup>S2</sup> Space group assignments were based upon systematic absences,  $E$  statistics, and successful refinement of the structures. Structures were solved by direct methods with the aid of successive difference Fourier maps,<sup>S3</sup> and were refined against all data using the APEX 2 software<sup>S1</sup> in conjunction with SHELXL-97<sup>S4</sup> and SHELXLE.<sup>S5</sup> Methyl hydrogen atoms were refined as part of rigid rotating groups, with a C–H distance of 0.98 Å and  $U_{\text{iso(H)}} = 1.5 \cdot U_{\text{eq(C)}}$ . Other H atoms were placed in calculated positions and refined using a riding model, with methylene and aromatic C–H distances of 0.99 and 0.95 Å, respectively, and  $U_{\text{iso(H)}} = 1.2 \cdot U_{\text{eq(C)}}$ . Non-hydrogen atoms were refined with anisotropic displacement parameters. Full-matrix least-squares refinements were carried out by minimizing  $\sum w(F_o^2 - F_c^2)^2$  with SHELXL-97 weighting scheme.<sup>S4</sup> Neutral atom scattering factors for all atoms and anomalous dispersion corrections for the non-hydrogen atoms were taken from *International Tables for Crystallography*.<sup>S6</sup> Images of the crystal structures were generated by Mercury.<sup>S7</sup> Crystallographic data (including structure factors) for the structures reported in this paper have been deposited with the Cambridge Crystallographic Data Centre as supplementary publication No.'s 1404189-1404195. Copies of the data can be obtained free of charge on application to CCDC, 12 Union Road, Cambridge CB2 1EZ, UK (fax: (+44)1223-336-033; e-mail: [deposit@ccdc.cam.ac.uk](mailto:deposit@ccdc.cam.ac.uk).)

**Table S1.** Crystallographic data for compounds **2a**, **2b**, **5a**, **6a**, **4b**, **5b** and **6b**.

|                                             | <b>7</b>                                                                                      | <b>2b</b>                                                                        | <b>5a</b>                                                           | <b>6a</b>                                                           | <b>4b</b>                                                           | <b>5b</b>                                                             | <b>6b</b>                                                              |
|---------------------------------------------|-----------------------------------------------------------------------------------------------|----------------------------------------------------------------------------------|---------------------------------------------------------------------|---------------------------------------------------------------------|---------------------------------------------------------------------|-----------------------------------------------------------------------|------------------------------------------------------------------------|
| <b>Formula</b>                              | C <sub>36</sub> H <sub>45</sub> Ag <sub>2</sub> F <sub>12</sub> N <sub>9</sub> P <sub>2</sub> | C <sub>23</sub> H <sub>28</sub> AgN <sub>6</sub> NaO <sub>7</sub> S <sub>2</sub> | C <sub>22</sub> H <sub>30</sub> ClF <sub>6</sub> N <sub>3</sub> PRh | C <sub>22</sub> H <sub>30</sub> ClF <sub>6</sub> IrN <sub>3</sub> P | C <sub>22</sub> H <sub>30</sub> ClN <sub>3</sub> O <sub>4</sub> OsS | C <sub>21</sub> H <sub>31</sub> ClN <sub>3</sub> O <sub>5.1</sub> RhS | C <sub>21</sub> H <sub>31</sub> ClIrN <sub>3</sub> O <sub>5.09</sub> S |
| <b>fw</b>                                   | 1109.49                                                                                       | 695.51                                                                           | 619.82                                                              | 709.13                                                              | 658.24                                                              | 577.55                                                                | 666.72                                                                 |
| <b>Colour/habit</b>                         | brown fragment                                                                                | colourless fragment                                                              | orange fragment                                                     | yellow plate                                                        | yellow block                                                        | orange block                                                          | yellow plate                                                           |
| <b>Cryst. dimensions (mm<sup>3</sup>)</b>   | 0.090 x 0.120 x 0.260                                                                         | 0.080 x 0.250 x 0.310                                                            | 0.134 x 0.232 x 0.277                                               | 0.090 x 0.179 x 0.290                                               | 0.186 x 0.230 x 0.370                                               | 0.227 x 0.231 x 0.279                                                 | 0.164 x 0.378 x 0.445                                                  |
| <b>Crystal system</b>                       | triclinic                                                                                     | triclinic                                                                        | orthorhombic                                                        | orthorhombic                                                        | monoclinic                                                          | monoclinic                                                            | monoclinic                                                             |
| <b>Space group</b>                          | <i>P</i> -1                                                                                   | <i>P</i> -1                                                                      | <i>P bca</i>                                                        | <i>P bca</i>                                                        | <i>P</i> 2 <sub>1</sub> / <i>c</i>                                  | <i>P</i> 2 <sub>1</sub> / <i>n</i>                                    | <i>P</i> 2 <sub>1</sub> / <i>n</i>                                     |
| <b>a, Å</b>                                 | 12.6948(6)                                                                                    | 9.0008(3)                                                                        | 14.9552(4)                                                          | 15.0548(6)                                                          | 10.5278(2)                                                          | 11.3895(3)                                                            | 11.3664(6)                                                             |
| <b>b, Å</b>                                 | 13.5073(6)                                                                                    | 12.2235(4)                                                                       | 15.0093(4)                                                          | 14.9891(6)                                                          | 17.4635(4)                                                          | 12.1721(3)                                                            | 12.2127(6)                                                             |
| <b>c, Å</b>                                 | 14.4562(7)                                                                                    | 13.4457(5)                                                                       | 21.7963(6)                                                          | 21.8205(9)                                                          | 13.6800(3)                                                          | 17.5563(5)                                                            | 17.5641(9)                                                             |
| <b>α, deg</b>                               | 94.699(2)                                                                                     | 71.899(2)                                                                        | 90                                                                  | 90                                                                  | 90                                                                  | 90                                                                    | 90                                                                     |
| <b>β, deg</b>                               | 105.537(2)                                                                                    | 82.767(2)                                                                        | 90                                                                  | 90                                                                  | 93.009(1)                                                           | 93.134(1)                                                             | 93.028(2)                                                              |
| <b>γ, deg</b>                               | 112.654(2)                                                                                    | 76.054(2)                                                                        | 90                                                                  | 90                                                                  | 90                                                                  | 90                                                                    | 90                                                                     |
| <b>V, Å<sup>3</sup></b>                     | 2155.71(18)                                                                                   | 1362.57(8)                                                                       | 4892.6(2)                                                           | 4924.0(3)                                                           | 2511.63(9)                                                          | 2430.26(11)                                                           | 2434.8(2)                                                              |
| <b>Z</b>                                    | 2                                                                                             | 2                                                                                | 8                                                                   | 8                                                                   | 4                                                                   | 4                                                                     | 4                                                                      |
| <b>T, K</b>                                 | 123                                                                                           | 123                                                                              | 123                                                                 | 123                                                                 | 123                                                                 | 123                                                                   | 123                                                                    |
| <b>D<sub>calcd</sub>, g cm<sup>-3</sup></b> | 1.709                                                                                         | 1.695                                                                            | 1.683                                                               | 1.913                                                               | 1.741                                                               | 1.579                                                                 | 1.819                                                                  |
| <b>μ, mm<sup>-1</sup></b>                   | 1.074                                                                                         | 0.964                                                                            | 0.935                                                               | 5.658                                                               | 5.299                                                               | 0.936                                                                 | 5.716                                                                  |
| <b>F(000)</b>                               | 1112                                                                                          | 708                                                                              | 2512                                                                | 2768                                                                | 1296                                                                | 1187.3                                                                | 1315                                                                   |

|                                                                    |                |               |               |                    |               |                         |               |
|--------------------------------------------------------------------|----------------|---------------|---------------|--------------------|---------------|-------------------------|---------------|
| <b><math>\theta</math> range, deg</b>                              | 1.84 – 26.87   | 2.02 – 25.35  | 1.87 – 25.35  | 1.87 – 26.02       | 1.89 – 26.37  | 2.04 – 33.14            | 2.32 – 25.35  |
| <b>Index ranges (<i>h</i>, <i>k</i>, <i>l</i>)</b>                 | ±16, ±17, ±18  | ±10, ±14, ±16 | ±18, ±18, ±26 | ±18, -16 – 18, ±26 | ±13, ±21, ±17 | -17 – 16, ±18, -24 – 27 | ±13, ±14, ±21 |
| <b>No. of rflns collected</b>                                      | 65786          | 50061         | 82866         | 92223              | 92387         | 51535                   | 24095         |
| <b>No. of independent rflns/<math>R_{int}</math></b>               | 9239/0.0717    | 4965/0.0748   | 4466/0.0649   | 4859/0.0476        | 5125/0.0589   | 9255/0.0494             | 4452/0.0461   |
| <b>No. of observed rflns (<math>I &gt; 2\sigma(I)</math>)</b>      | 6537           | 3948          | 3634          | 4133               | 4445          | 8308                    | 4266          |
| <b>No. of data/restraints/parameters</b>                           | 9239/0/ 553    | 4965/0/363    | 4466/0/313    | 4859/0/313         | 5125/0/294    | 9255/6/311              | 4452/6/320    |
| <b>R1/wR2 (<math>I &gt; 2\sigma(I)</math>)<sup>a</sup></b>         | 0.0390/ 0.0819 | 0.0303/0.0546 | 0.0336/0.0669 | 0.0179/0.0360      | 0.0227/0.0491 | 0.0237/0.0595           | 0.0201/0.0501 |
| <b>R1/wR2 (all data)<sup>a</sup></b>                               | 0.0729/ 0.0927 | 0.0492/0.0593 | 0.0497/0.0751 | 0.0251/0.0384      | 0.0306/0.0515 | 0.0281/0.0617           | 0.0210/0.0506 |
| <b>GOF (on <math>F^2</math>)<sup>a</sup></b>                       | 1.007          | 1.022         | 1.113         | 1.026              | 1.040         | 1.071                   | 1.208         |
| <b>Largest diff peak and hole (e <math>\text{\AA}^{-3}</math>)</b> | 1.054/ -0.959  | 0.435/-0.403  | 0.094/-0.646  | 0.797/-0.515       | 1.368/-0.745  | 0.708/-0.878            | 1.803/-0.745  |

---

<sup>[a]</sup>  $R1 = \sum(|F_o| - |F_c|) / \sum|F_o|$ ;  $wR2 = \{\sum [w(F_o^2 - F_c^2)^2] / \sum [w(F_o^2)^2]\}^{1/2}$ ;  $GOF = \{\sum [w(F_o^2 - F_c^2)^2] / (n-p)\}^{1/2}$

**Table S2.** Selected bond lengths (Å) and bond angles (°) for rhodium and iridium complexes.

| Complex                                                         |                                                       | 5a <sup>a</sup>                                                 | 5b <sup>b</sup> | 6a <sup>a</sup> | 6b <sup>b</sup> |            |
|-----------------------------------------------------------------|-------------------------------------------------------|-----------------------------------------------------------------|-----------------|-----------------|-----------------|------------|
| Bond lengths (Å)                                                | M(1)–C(1)                                             | 2.023(3)                                                        | 2.0263(11)      | 2.018(3)        | 2.021(2)        |            |
|                                                                 | M(1)–N(3)                                             | 2.128(3)                                                        | 2.118(10)       | 2.122(2)        | 2.107(2)        |            |
|                                                                 | M(1)–Cl(1)                                            | 2.4065(8)                                                       | 2.4053(3)       | 2.4090(7)       | 2.4088(6)       |            |
|                                                                 | M(1)–C(12) <sup>b</sup> or<br>M(1)–C(13) <sup>a</sup> | 2.155(3)                                                        | 2.1992(11)      | 2.165(3)        | 2.173(2)        |            |
|                                                                 | M(1)–C(13) <sup>b</sup> or<br>M(1)–C(14) <sup>a</sup> | 2.213(3)                                                        | 2.1566(12)      | 2.232(3)        | 2.227(3)        |            |
|                                                                 | M(1)–C(14) <sup>b</sup> or<br>M(1)–C(15) <sup>a</sup> | 2.236(3)                                                        | 2.2264(12)      | 2.250(3)        | 2.233(2)        |            |
|                                                                 | M(1)–C(15) <sup>b</sup> or<br>M(1)–C(16) <sup>a</sup> | 2.154(3)                                                        | 2.2159(11)      | 2.163(2)        | 2.166(3)        |            |
|                                                                 | M(1)–C(16) <sup>b</sup> or<br>M(1)–C(17) <sup>a</sup> | 2.181(3)                                                        | 2.1673(11)      | 2.180(3)        | 2.198(2)        |            |
|                                                                 | Bond angles (°)                                       | C(1)–M(1)–N(3)                                                  | 76.78(12)       | 76.82(4)        | 76.33(10)       | 76.22(9)   |
|                                                                 |                                                       | C(1)–M(1)–Cl(1)                                                 | 85.53(9)        | 86.28(3)        | 85.20(7)        | 86.12(7)   |
|                                                                 |                                                       | N(3)–M(1)–Cl(1)                                                 | 89.03(8)        | 87.99(3)        | 86.78(6)        | 86.02(5)   |
|                                                                 |                                                       | C(1)–M(1)–C(12) <sup>a</sup> or<br>C(1)–M(1)–C(13) <sup>b</sup> | 117.04(13)      | 102.54(4)       | 117.33(11)      | 124.35(10) |
|                                                                 |                                                       | C(1)–M(1)–C(13) <sup>a</sup> or<br>C(1)–M(1)–C(14) <sup>b</sup> | 155.12(13)      | 113.39(4)       | 155.12(11)      | 163.12(10) |
| C(1)–M(1)–C(14) <sup>a</sup> or<br>C(1)–M(1)–C(15) <sup>b</sup> |                                                       | 154.84(13)                                                      | 149.56(4)       | 156.47(10)      | 150.05(10)      |            |
| C(1)–M(1)–C(15) <sup>a</sup> or<br>C(1)–M(1)–C(16) <sup>b</sup> |                                                       | 117.07(13)                                                      | 162.11(5)       | 118.51(10)      | 114.26(9)       |            |
| C(1)–M(1)–C(16) <sup>a</sup> or<br>C(1)–M(1)–C(17) <sup>b</sup> |                                                       | 100.50(13)                                                      | 123.12(5)       | 101.47(10)      | 103.85(10)      |            |
| Torsion angles (°)                                              |                                                       | C(1)–N(2)–C(4)–N(3)                                             | -2.2(4)         | -0.04(15)       | -2.0(3)         | -0.05(3)   |

### 3. References

- S1 APEX suite of crystallographic software. APEX 2 Version 2008.4. Bruker AXS Inc., Madison, Wisconsin, USA, 2008.
- S2 SAINT, Version 7.56a and SADABS Version 2008/1. Bruker AXS Inc., Madison, Wisconsin, USA, 2008.
- S3 G. M. Sheldrick, "**SHELXS-97**", Program for Crystal Structure Solution, Göttingen, 1997.
- S4 G. M. Sheldrick, "SHELXL-97", University of Göttingen, Göttingen, Germany, 1998, *or* Sheldrick, G. M. "SHELXL-2014", University of Göttingen, Göttingen, Germany, 2014.
- S5 C. B. Huebschle, G. M. Sheldrick and B. Dittrich, "SHELXLE", *J. Appl. Cryst.*, 2011, **44**, 1281.
- S6 A. J. C. Wilson, (Ed.), International Tables for Crystallography, Vol. C, Tables 6.1.1.4 (pp. 500-502), 4.2.6.8 (pp. 219-222), and 4.2.4.2 (pp. 193-199), Kluwer Academic Publishers, Dordrecht, The Netherlands, 1992.
- S7 Mercury: visualization and analysis of crystal structures C.F. Macrae, P.R. Edgington, P McCabe, E. Pidcock, G.P. Shields, R. Taylor, M. Towler, J. van de Streek, *J. Appl. Cryst.* (2006), 39-3, 453-457.
